# Supplementary material for: Effects of Concomitant Medications on the Therapeutic Effectiveness of PD-1/PD-L1 Inhibitors in Advanced Non-Small Cell Lung Cancer: A Retrospective Cohort Study
Source: Research Square preprint supplement (doi:10.21203/rs.3.rs-6615560/v1), 2025-05-23
Supplement: Supplementary file 1 [file a5616ec82a5f4e8f951f6a9d.docx]

**Supplementary materials**

Table1 Comparison of ORR, DCR, and PFS in Patients with and without Concomitant Medications

| **Group** | **ORR (%)** | ***P*** | **DCR (%)** | ***P*** | **mPFS (months)** | ***P*** |
| --- | --- | --- | --- | --- | --- | --- |
| Antibacterial agents | 12.3 | 0.002 | 28.7 | **<0.001** | 4.8 | **<0.001** |
| Without-Antibacterial agents | 21.9 |  | 64.8 |  | 11.6 |  |
| GCs | 16.6 | 0.088 | 50 | 0.001 | 6 | **<0.001** |
| Without-GCs | 22.2 |  | 67.2 |  | 15 |  |
| PPI | 16.4 | 0.117 | 42.9 | **<0.001** | 5.7 | **<0.001** |
| Without-PPI | 21.7 |  | 66.5 |  | 13.4 |  |
| NSAIDs | 9.1 | 0.003 | 25.9 | **<0.001** | 4.5 | **<0.001** |
| Without-NSAIDs | 20.4 |  | 56.7 |  | 8.5 |  |
| Antihistamines | 19.5 | 0.516 | 48 | 0.191 | 6.1 | **<0.001** |
| Without-Antihistamines | 17.5 |  | 53.3 |  | 8.1 |  |
| Anticoagulants | 18.2 | 0.184 | 43 | 0.005 | 5.6 | **<0.001** |
| Without-Anticoagulants | 18.4 |  | 54.9 |  | 8.5 |  |
| Opioids | 14.2 | **<0.001** | 34.6 | **<0.001** | 5.6 | **<0.001** |
| Without-Opioids | 20.7 |  | 56.8 |  | 10 |  |
| Antihypertensives | 17.7 | 0.809 | 38.6 | 0.165 | 6.5 | 0.168 |
| Without-Antihypertensives | 13.7 |  | 46.4 |  | 5.5 |  |
| Sedative-hypnotics | 16.9 | 0.222 | 53.1 | 0.197 | 7.1 | 0.067 |
| Without-Sedative-hypnotics | 20.8 |  | 47.9 |  | 7.8 |  |
| β2-adrenergic receptor agonists | 16.7 | 0.521 | 41.5 | 0.099 | 5.5 | 0.066 |
| Without-β2-adrenergic receptor agonists | 18.6 |  | 52.3 |  | 7.7 |  |
| Muscarinic receptor agonists | 23.4 | 0.264 | 7.8 | 0.267 | 10 | 0.489 |
| Without-Muscarinic receptor agonists | 17.7 |  | 50.5 |  | 7.3 |  |
| Antidiabetics | 9.5 | 0.031 | 49.2 | 0.465 | 6 | 0.791 |
| Without-Antidiabetics | 23.8 |  | 42.9 |  | 6.3 |  |
| Statins | 12.1 | 0.084 | 50.5 | 0.875 | 8.3 | 0.981 |
| Without-Statins | 19.4 |  | 51.4 |  | 7.2 |  |
| Aspirin | 29.3 | 0.003 | 63 | 0.014 | 11.2 | 0.004 |
| Without-Aspirin | 16.5 |  | 49.3 |  | 7 |  |
| Clopidogrel | 18.4 | 0.968 | 49.5 | 0.704 | 6.4 | 0.282 |
| Without-Clopidogrel | 18.3 |  | 51.6 |  | 7.7 |  |

**
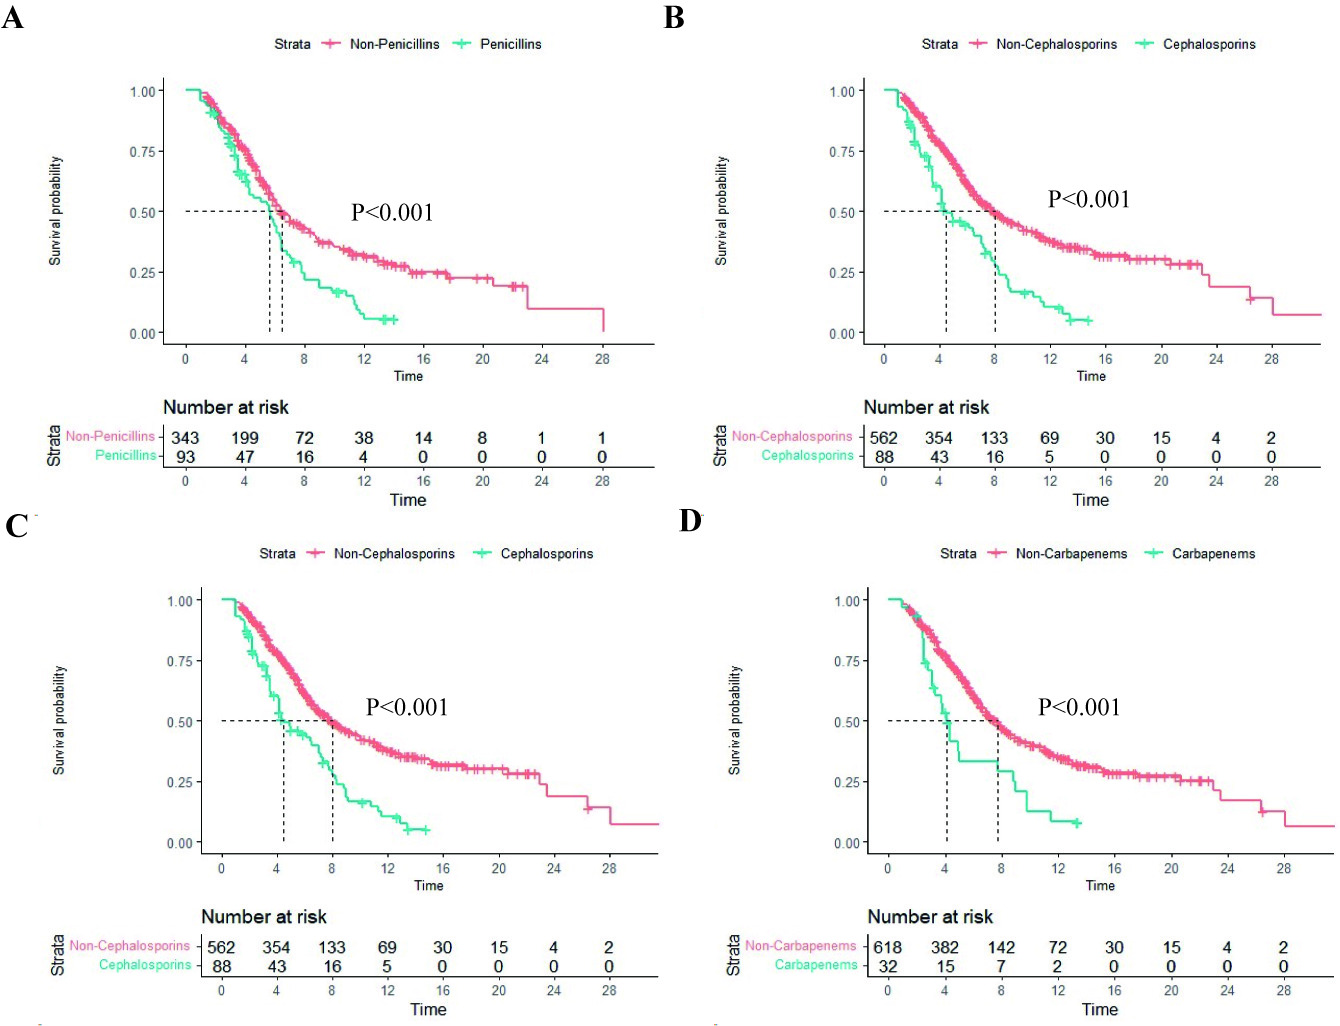
**

**Fig 1: Kaplan-Meier survival curves of PFS in patients treated with different classes of antimicrobial agents**; (A) Penicillin class: 5.1 vs 8.5 months; [HR], 2.319; 95% CI 1.790-3.005; (B) Cephalosporin class: 4.5 vs 8.0 months; [HR], 2.155; 95% CI 1.635-2.839; (C) Quinolone class: 5.3 vs 8.3 months; [HR], 2.035; 95% CI 1.602-2.586; (D) Carbapenem class: 4.1 vs 7.7 months; [HR], 2.155; 95% CI 1.431-3.247.

**
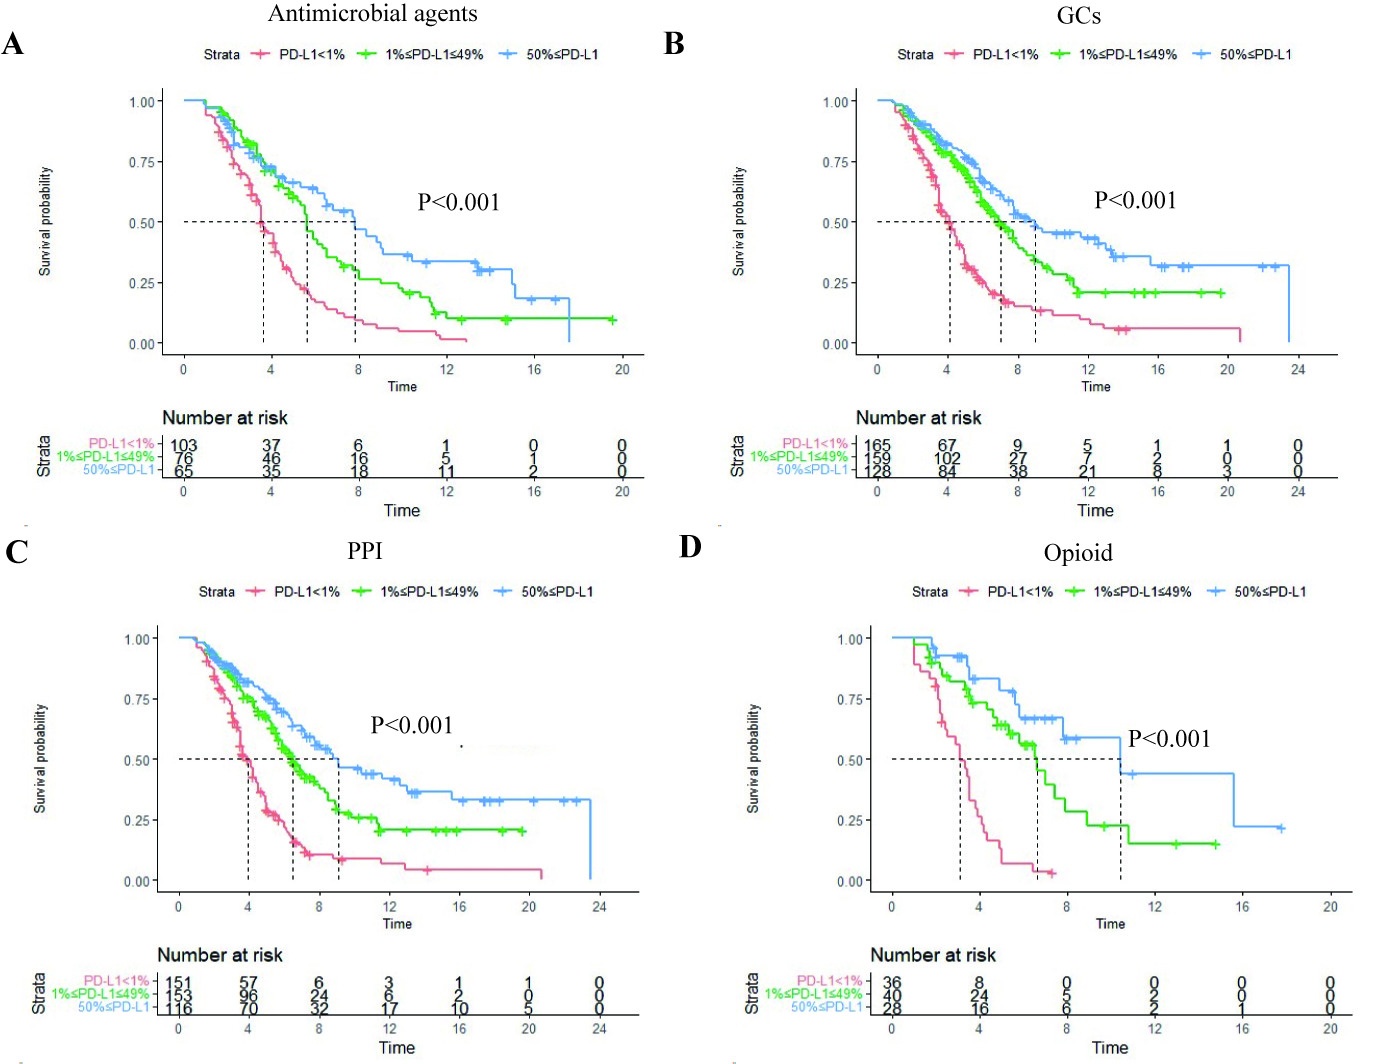
**

**Fig 2: Kaplan-Meier survival curves of PFS in patients with different PD-L1 expression receiving antimicrobial agents, glucocorticoid, proton pump inhibitors, and opioids;** (A) antimicrobial agents: 3.6 vs 5.6 vs 7.8 months; P<0.001; (B) Glucocorticoid: 4.1 vs 7.0 vs 9.0 months; P<0.001; (C) Proton pump inhibitors: 3.9 vs 6.5 vs 9.1 months; P<0.001; (D) Opioids: 3.1 vs 6.6 vs 10.4 months; P<0.001.
